# Supplementary material
Source: publisher figshare collection journal article supplement (https://acs.figshare.com/ndownloader/files/4403836)
Supplement: Supplementary file 1 [file 4403836]

# Photocatalytic and Conductive MWCNT/TiO<sub>2</sub> Nanocomposite Thin Films

*Kwadwo E. Tettey<sup>§</sup>, Michael Q. Yee<sup>‡</sup>, and Daeyeon Lee<sup>\* §</sup>*

Department of Chemical and Biomolecular Engineering, University of Pennsylvania,  
Philadelphia, Pennsylvania 19104 (USA)

\* daeyeon@seas.upenn.edu

<sup>§</sup> Department of Chemical and Biomolecular Engineering, University of Pennsylvania

<sup>‡</sup> Department of Bioengineering, University of Pennsylvania

## SUPPORTING INFORMATION

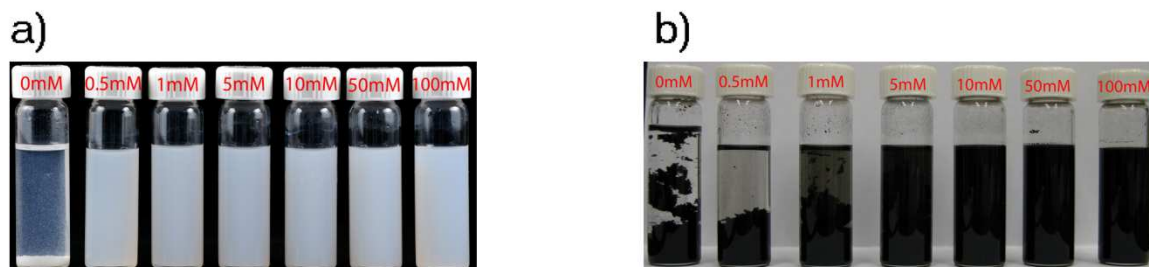

**Figure S1.** (a)  $\text{TiO}_2$  and (b) MWCNTs dispersed in toluene containing different AOT concentrations shown in red text.

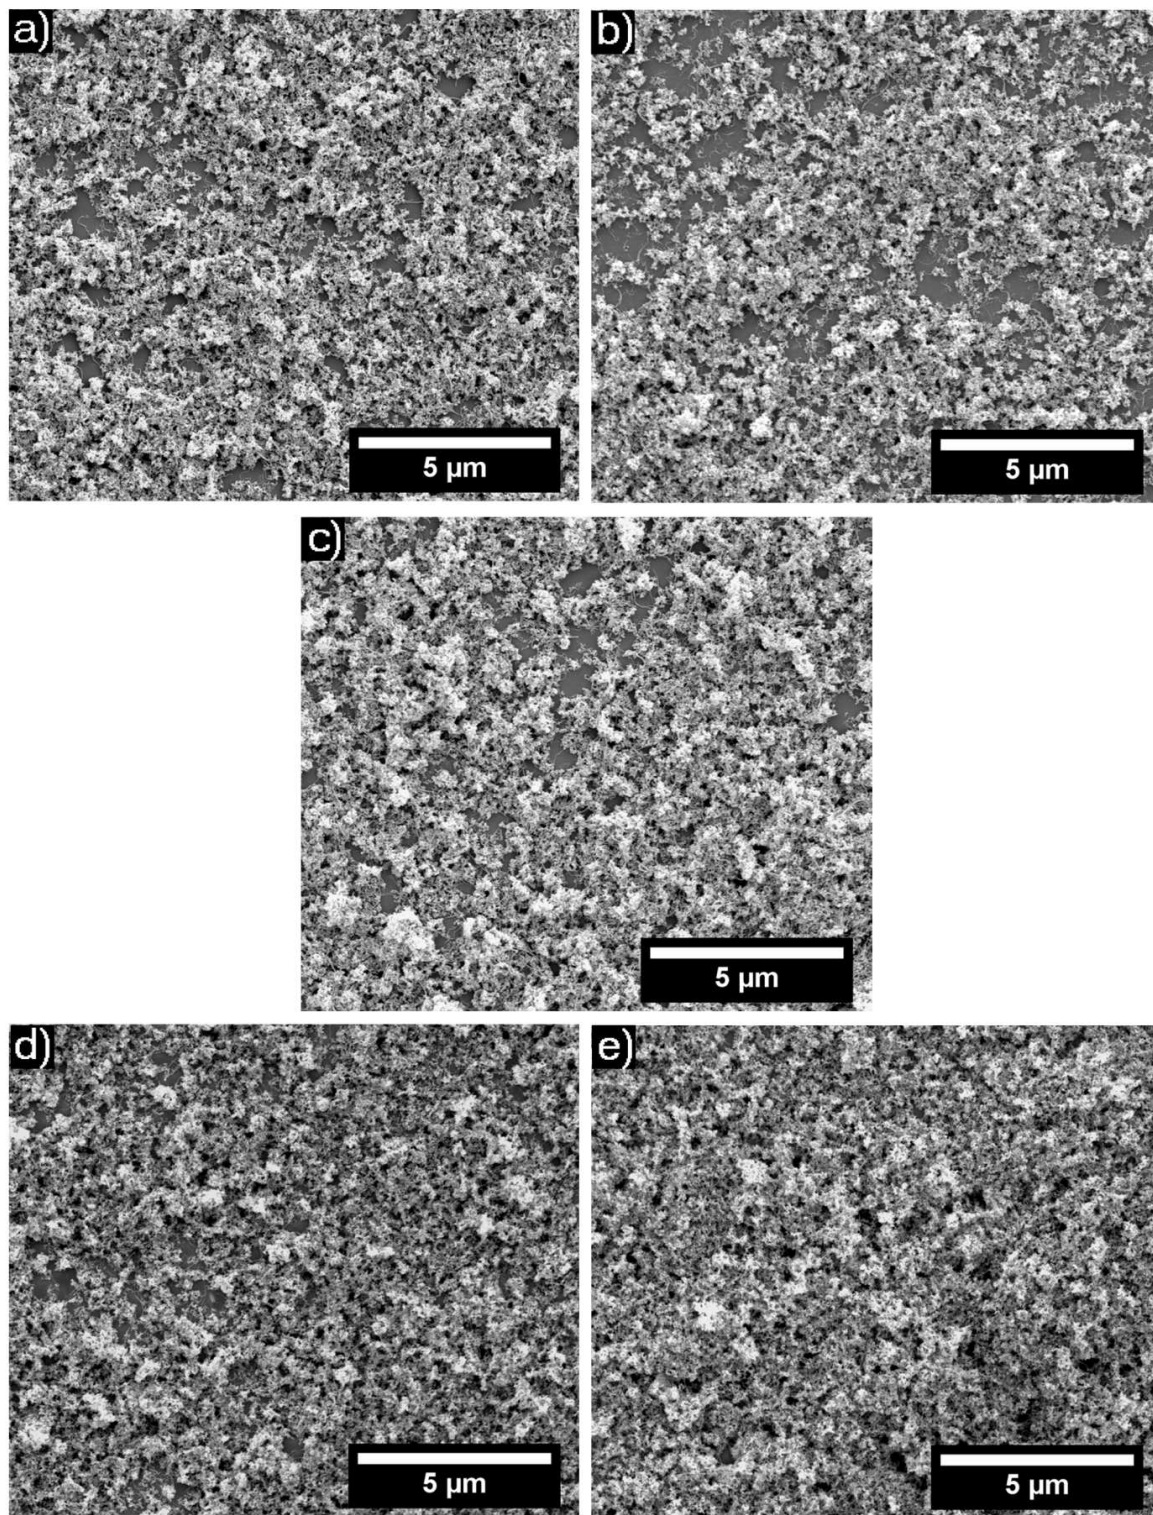

**Figure S2.** SEM images for 20-bilayer MWCNT/TiO<sub>2</sub> films composed with (a) 5 mM, (b) 10 mM, (c) 50 mM, (d) 100 mM and (e) 200 mM AOT.

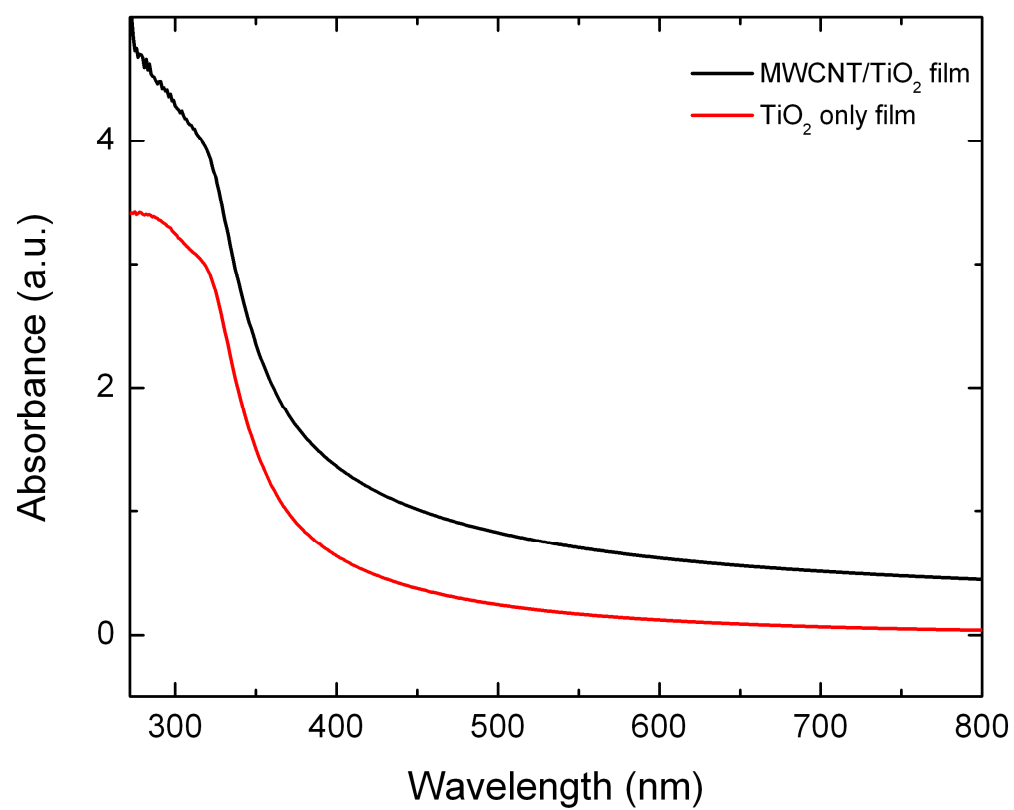

**Figure S3.** UV–Vis absorbance spectra for MWCNT/TiO<sub>2</sub> film (black line) and TiO<sub>2</sub> only film (red line).

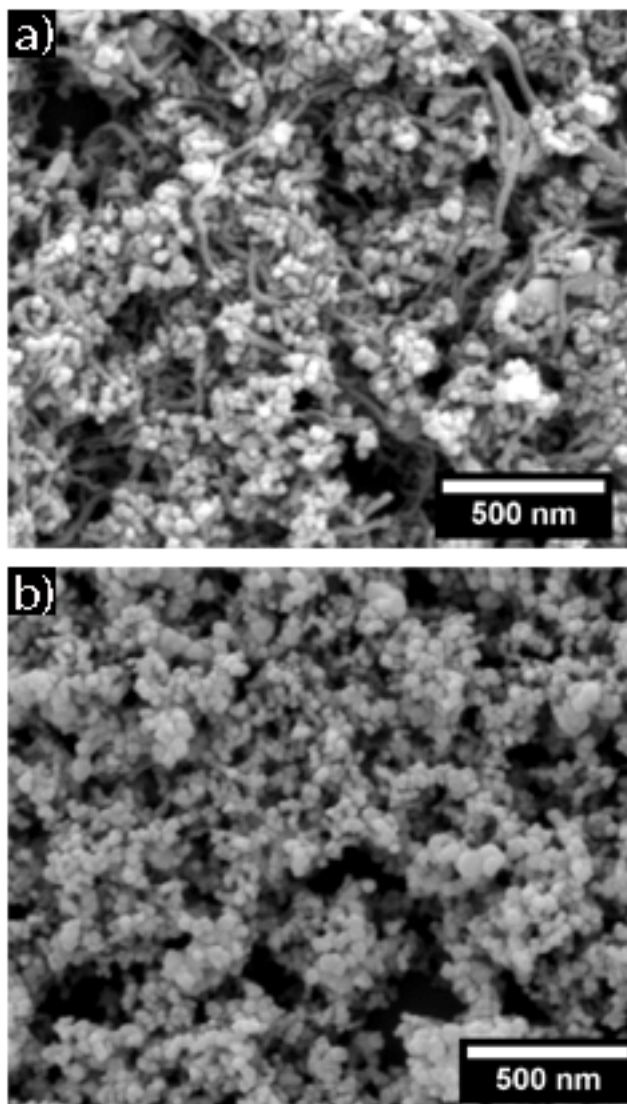

**Figure S4.** SEM images showing topography of (a) MWCNT/TiO<sub>2</sub> and (b) TiO<sub>2</sub> films.

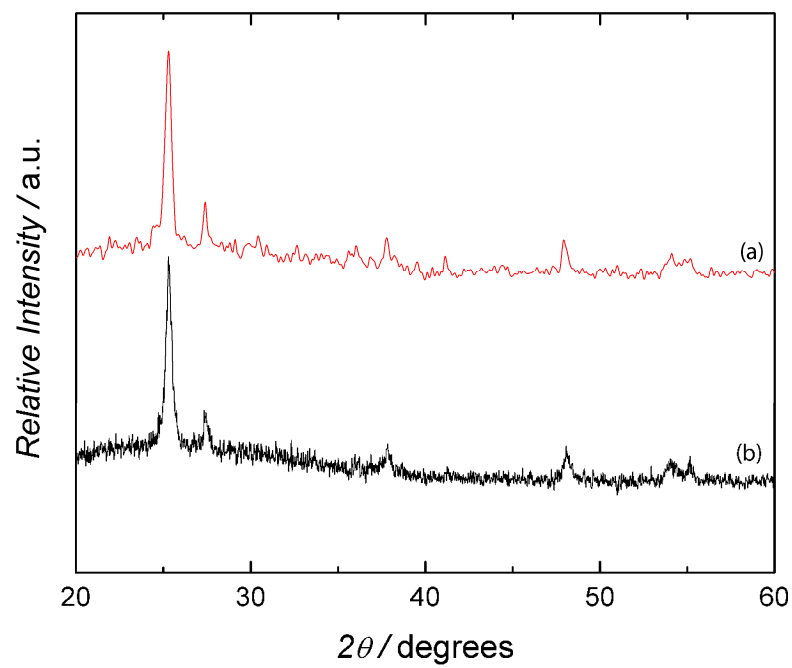

**Figure S5.** XRD pattern for (a) TiO<sub>2</sub>-P25 calcined at 600°C for 1 hour and (b) untreated TiO<sub>2</sub>-P25

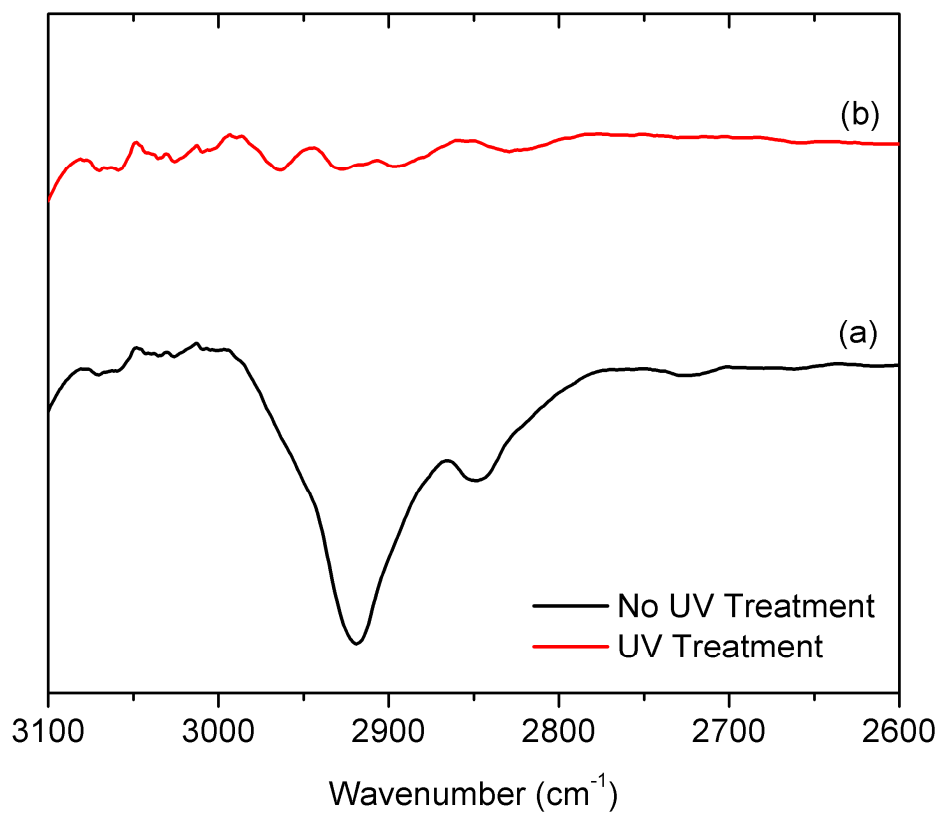

**Figure S6.** FTIR spectra for (a) MWCNT/TiO<sub>2</sub> nanocomposite before UV treatment (black) and (b) after UV treatment (red). Peaks between 3000 and 2800 cm<sup>-1</sup> represent alkane groups of AOT.
